# Supplementary material
Source: HighWire-hosted journal article supplement (https://bibliotheek.ehb.be/content/12/1/e002721)
Supplement: inline-supplementary-material-1 [file inline-supplementary-material-1.pdf]

## SUPPLEMENTAL MATERIAL

## Supplementary Tables.

**Supplementary Table 1.** Linear, mixed-effects modelling: Effects of selected variables (disease markers) at baseline, on baseline spirometric and CCP parameters in the sub-cohort of patients who subsequently received biologics.

| <b>Dependent Variable: FEV<sub>1</sub> % pred</b>             |                 |                          |    |         |
|---------------------------------------------------------------|-----------------|--------------------------|----|---------|
| Fixed Effects                                                 | Est Coefficient | 95% CI<br>[Lower, Upper] | dF | p-value |
| Intercept                                                     | 89.8            | [79.3, 100.4]            | 64 | p<0.001 |
| BD                                                            | 6.2             | [4.6, 7.8]               | 64 | p<0.001 |
| ACQ5                                                          | -4.9            | [-8.8, -1.0]             | 62 | p=0.019 |
| BEC (x10 <sup>9</sup> L <sup>-1</sup> )                       | -9.8            | [-21.6, 2.0]             | 62 | p=0.106 |
| <b>Dependent Variable: FVC % pred</b>                         |                 |                          |    |         |
| Fixed Effects                                                 | Est Coefficient | 95% CI<br>[Lower, Upper] | dF | p-value |
| Intercept                                                     | 108.0           | [98.8, 117.2]            | 63 | p<0.001 |
| BD                                                            | 5.0             | [2.8, 7.2]               | 63 | p<0.001 |
| ACQ5                                                          | -7.0            | [-10.3, -3.7]            | 61 | p<0.001 |
| FENO                                                          | 0.1             | [0.0-0.2]                | 61 | p=0.056 |
| BEC (x10 <sup>9</sup> L <sup>-1</sup> )                       | -7.5            | [-17.3, 2.3]             | 61 | p=0.143 |
| <b>Dependent Variable: <math>\sigma</math>lnC<sub>L</sub></b> |                 |                          |    |         |
| Fixed Effects                                                 | Est Coefficient | 95% CI<br>[Lower, Upper] | dF | p-value |
| Intercept                                                     | 0.76            | [0.68, 0.84]             | 60 | p<0.001 |
| BD                                                            | -0.08           | [-0.12, -0.04]           | 54 | p<0.001 |
| BEC                                                           | 0.21            | [0.09, 0.33]             | 60 | p<0.001 |
| <b>Dependent Variable: <math>\sigma</math>V<sub>D</sub></b>   |                 |                          |    |         |
| Fixed Effects                                                 | Est Coefficient | 95% CI<br>[Lower, Upper] | dF | p-value |
| Intercept                                                     | 0.40            | [0.36, 0.44]             | 60 | p<0.001 |
| BD                                                            | -0.03           | [-0.05, -0.01]           | 54 | p=0.022 |
| BEC (x10 <sup>9</sup> L <sup>-1</sup> )                       | 0.04            | [-0.02, 0.10]            | 60 | p=0.182 |

CI: Confidence Interval; Df, degrees of freedom; Est, estimated; ACQ-5, asthma control questionnaire-5, FeNO, fractional exhaled nitric oxide, BEC, blood eosinophil count, BD, bronchodilation; FEV<sub>1</sub>, forced expiratory volume in 1s; FVC, forced vital capacity; standard deviation for the standardised deadspace; FRC, functional residual capacity;  $\sigma$ lnC<sub>L</sub>, standard deviation for the natural logarithm for the standardised lung compliance. Note non-significant terms were sequentially removed from the model with the least significant first (only include variables with p-value of <0.2).

**Supplementary Table 2.** Linear, mixed-effects modelling: Effects of biologic therapy on spirometric and computed cardiopulmonography parameters in patients with severe Type-2 high asthma.

| <b>Dependent Variable: FEV<sub>1</sub> % pred</b> |           |                          |     |         |
|---------------------------------------------------|-----------|--------------------------|-----|---------|
| Fixed Effects                                     | Est Value | 95% CI<br>[Lower, Upper] | dF  | p-value |
| Intercept                                         | 74.2      | [69.3, 79.1]             | 168 | p<0.001 |
| BD                                                | 6.0       | [3.8, 8.2]               | 168 | p<0.001 |
| Visit                                             | 5.8       | [3.5, 8.2]               | 168 | p<0.001 |
| <b>Dependent Variable: FVC % pred</b>             |           |                          |     |         |
| Fixed Effects                                     | Est Value | 95% CI<br>[Lower, Upper] | dF  | p-value |
| Intercept                                         | 93.1      | [88.6, 97.6]             | 167 | p<0.001 |

|       |     |            |     |         |
|-------|-----|------------|-----|---------|
| BD    | 3.4 | [1.2, 5.6] | 167 | p=0.004 |
| Visit | 4.4 | [2.0, 6.8] | 167 | p<0.001 |

**Dependent Variable:  $\sigma\ln C_L$** 

| Fixed Effects | Est Value | 95% CI<br>[Lower, Upper] | dF  | p-value |
|---------------|-----------|--------------------------|-----|---------|
| Intercept     | 0.85      | [0.79, 0.91]             | 151 | p<0.001 |
| BD            | -0.07     | [-0.11, -0.03]           | 151 | p<0.001 |
| Visit         | -0.04     | [-0.08, -0.00]           | 151 | p=0.019 |

**Dependent Variable:  $\sigma VD$** 

| Fixed Effects | Est Value | 95% CI<br>[Lower, Upper] | dF  | p-value |
|---------------|-----------|--------------------------|-----|---------|
| Intercept     | 0.41      | [0.39, 0.43]             | 151 | p<0.001 |
| BD            | -0.03     | [-0.05, -0.01]           | 151 | p=0.021 |
| Visit         | -0.02     | [-0.04, -0.00]           | 151 | p=0.081 |

Note: visit\*type of biologic was non-significant and hence removed from the model, as was type of biologic.

**Supplementary Table 3.** Linear, mixed-effects modelling: Exploring the effects of changes induced by biologic therapy on blood eosinophils, the fraction of exhaled nitric oxide and ACQ-5 symptom score on spirometric and computed cardiopulmonography parameters in the subgroup of patients who had a follow-up visit at 3-4 months after starting biologic therapy.

**Dependent Variable: FEV<sub>1</sub> % pred**

| Fixed Effects                           | Est Value | 95% CI<br>[Lower, Upper] | dF  | p-value |
|-----------------------------------------|-----------|--------------------------|-----|---------|
| Intercept                               | 86.9      | [81.4, 92.4]             | 144 | p<0.001 |
| BD                                      | 5.9       | [3.9, 7.9]               | 144 | p<0.001 |
| ACQ5                                    | -3.5      | [-5.1, -1.9]             | 144 | p<0.001 |
| BEC (x10 <sup>9</sup> L <sup>-1</sup> ) | -10.8     | [-16.1, -5.5]            | 144 | p<0.001 |

**Dependent Variable: FVC % pred**

| Fixed Effects                           | Est Value | 95% CI<br>[Lower, Upper] | dF  | p-value |
|-----------------------------------------|-----------|--------------------------|-----|---------|
| Intercept                               | 102.1     | [97.0, 107.2]            | 143 | p<0.001 |
| BD                                      | 3.7       | [1.5, 5.9]               | 143 | p=0.001 |
| ACQ5                                    | -2.5      | [-4.3, -0.7]             | 143 | p=0.004 |
| BEC (x10 <sup>9</sup> L <sup>-1</sup> ) | -8.2      | [-13.7, -2.7]            | 143 | p=0.004 |

**Dependent Variable:  $\sigma\ln C_L$** 

| Fixed Effects                           | Est Value | 95% CI<br>[Lower, Upper] | dF  | p-value |
|-----------------------------------------|-----------|--------------------------|-----|---------|
| Intercept                               | 0.75      | [0.69, 0.81]             | 128 | p<0.001 |
| BD                                      | -0.07     | [-0.09, -0.05]           | 128 | p<0.001 |
| BEC (x10 <sup>9</sup> L <sup>-1</sup> ) | 0.19      | [0.11, 0.27]             | 128 | p<0.001 |
| ACQ5                                    | 0.02      | [0.00, 0.04]             | 128 | p=0.178 |

**Dependent Variable:  $\sigma VD$** 

| Fixed Effects                           | Est Value | 95% CI<br>[Lower, Upper] | dF  | p-value |
|-----------------------------------------|-----------|--------------------------|-----|---------|
| Intercept                               | 0.39      | [0.37, 0.41]             | 149 | p<0.001 |
| BD                                      | -0.02     | [-0.04, 0.00]            | 149 | p=0.025 |
| BEC (x10 <sup>9</sup> L <sup>-1</sup> ) | 0.05      | [0.01, 0.09]             | 149 | p=0.008 |

CI: Confidence Interval; Df, degrees of freedom; Est, estimated; ACQ-5, asthma control questionnaire-5; FeNO, fractional exhaled nitric oxide; BEC, blood eosinophil count; BD, bronchodilation; FEV<sub>1</sub>, forced expiratory volume in 1s; FVC, forced vital capacity; standard deviation for the standardised deadspace; FRC, functional residual capacity;  $\sigma\ln C_L$ , standard deviation for the natural

logarithm for the standardised lung compliance. Note non-significant terms were sequentially removed from the model with the least significant first (only included variables with p-value of <0.2 here).

**Supplementary Table 4.** Comparison of characteristics between the patients that did and did not show a response in post-bronchodilator  $\sigma\ln\text{Cl}$  to therapy with biologics at their 4<sup>th</sup> injection.

| Characteristics                                                 | $\sigma\ln\text{Cl}$ non-responders | $\sigma\ln\text{Cl}$ responders |
|-----------------------------------------------------------------|-------------------------------------|---------------------------------|
| Number of participants (% participants)                         | 24 (53)                             | 21 (47)                         |
| OCS (% of patients on maintenance)                              | 11 (46)                             | 8 (38)                          |
| Baseline Exacerbation Frequency/year                            | 4.8±2.4                             | 5±3                             |
| Exacerbation Frequency after 1 year /year                       | 0.46 ± 0.72                         | 0.29 ± 0.85                     |
| Baseline Blood Eosinophil Count / $\times 10^9 \text{ L}^{-1}$  | 0.35±0.34                           | 0.52±0.55                       |
| Follow-up Blood Eosinophil Count / $\times 10^9 \text{ L}^{-1}$ | 0.05±0.05                           | 0.04±0.04                       |
| $\Delta$ Blood Eosinophil Count / $\times 10^9 \text{ L}^{-1}$  | -0.31±0.32                          | -0.48±0.54                      |
| Baseline FeNO / ppb                                             | 46±41                               | 41±28                           |
| Follow-up FeNO / ppb                                            | 49±35                               | 51±44                           |
| $\Delta$ FeNO / ppb                                             | 3±27                                | 9±36                            |
| Baseline ACQ-5 score                                            | 2.1±1.2                             | 2.5 ±1.3                        |
| Follow up ACQ-5 score                                           | 1.4±1.1                             | 0.8±0.9                         |
| $\Delta$ ACQ-5 score                                            | -0.5±0.9                            | -1.3±1.3*                       |
| Baseline pre-BD FEV <sub>1</sub> / % predicted                  | 83±24                               | 68±20*                          |
| Follow-up pre-BD FEV <sub>1</sub> % predicted                   | 81±25                               | 82±23                           |
| $\Delta$ FEV <sub>1</sub> / % predicted                         | -2±13                               | 15±15***                        |
| Baseline pre-BD FVC / % predicted                               | 100±19                              | 89±19                           |
| Follow-up pre-BD FVC / % predicted                              | 101±24                              | 102±15                          |
| $\Delta$ FVC / % predicted                                      | 1.3±13                              | 13±15*                          |
| Baseline pre-BD FEV <sub>1</sub> /FVC                           | 0.66±0.11                           | 0.59±0.11*                      |
| Follow-up pre-BD FEV <sub>1</sub> /FVC                          | 0.65±0.13                           | 0.62±0.11                       |
| Baseline pre-BD V <sub>D</sub>                                  | 0.144±0.044                         | 0.185±0.100                     |
| Follow-up pre-BD V <sub>D</sub>                                 | 0.153±0.051                         | 0.148±0.055                     |
| $\Delta$ V <sub>D</sub>                                         | 0.01±0.03                           | -0.05±0.07                      |
| Baseline pre-BD $\sigma$ V <sub>D</sub>                         | 0.38±0.10                           | 0.48±0.11***                    |
| Follow-up pre-BD $\sigma$ V <sub>D</sub>                        | 0.42±0.11                           | 0.40±0.12                       |
| $\Delta$ $\sigma$ V <sub>D</sub>                                | 0.03±0.12                           | -0.09±0.13*                     |
| Baseline pre-BD FRC                                             | 2.9±0.70                            | 3.1±0.86                        |
| Follow up pre-BD FRC                                            | 3.0±0.65                            | 3.2±0.9                         |
| $\Delta$ FRC                                                    | 0.08±0.22                           | -0.07±0.57                      |
| Baseline pre-BD $\sigma\ln\text{Cl}$                            | 0.74±0.16                           | 0.98 ±0.24***                   |
| Follow-up pre-BD $\sigma\ln\text{Cl}$                           | 0.84±0.21                           | 0.81±0.20                       |

$\sigma\ln\text{Cl}$ , standard deviation for the natural logarithm for the standardised lung compliance; FEV<sub>1</sub>, forced expiratory volume in 1s; FVC, forced vital capacity; V<sub>D</sub>, deadspace volume (end inspiratory);  $\sigma$ V<sub>D</sub>, standard deviation for the standardised deadspace; FRC, functional residual capacity;  $\sigma\ln\text{Cl}$ , standard deviation for the natural logarithm for the standardised lung compliance.  $\Delta$ , change in parameter value between baseline and follow up visits. Statistical comparisons are for the  $\sigma\ln\text{Cl}$ -Non-Responders with the  $\sigma\ln\text{Cl}$ -Responders. Values are means ± SD, \*p<0.05, \*\*p<0.01, \*\*\* p<0.001.
